# Supplementary material for: Considering indirect benefits is critical when evaluating SARS-CoV-2 vaccine candidates
Source: PubMed Central journal article supplement — medRxiv. 2020 Aug 11:2020.08.07.20170456. Preprint. [Version 1] doi: 10.1101/2020.08.07.20170456 (PMC7430602; doi:10.1101/2020.08.07.20170456), 2020-08-11
Supplement: NIHPP2020.08.07.20170456-supplement-1.pdf [file NIHPP2020.08.07.20170456-supplement-1.pdf]

124 **Supplementary Material**

125 **Model Equations**

126 We model the dynamics of SARS-CoV-2 using a set of deterministic ordinary differential equations,  
 127 with susceptible individuals  $S$ , exposed individuals  $E$ , infected individuals  $I$ , and recovered indi-  
 128 viduals  $R$ . Subscripts  $c$  and  $sc$  refer to clinical and subclinical infections. Subscript  $v$  denotes those  
 129 that are vaccinated. Population size  $N$  is constant.

130  $\beta$  represents the transmission rate (infectiousness),  $\frac{1}{\sigma}$  represents the average latent period,  $\nu$  repre-  
 131 sents the proportion of exposed individuals who develop clinical symptoms,  $\frac{1}{\gamma}$  represents the average  
 132 infectious period, and  $\rho_c$  represents the probability of death due to clinical infections.

133 Vaccine 1: reduces risk of clinical infection to 30% of the original value and transmission rate to  
 134 70% of the original value:

135  $\nu_v = 0.3\nu, \beta_v = 0.7\beta$

136 Vaccine 2: reduces risk of clinical infection to 70% of the original value and transmission rate to  
 137 30% of the original value:

138  $\nu_v = 0.7\nu, \beta_v = 0.3\beta$

139

$$\begin{aligned}
 \frac{dS}{dt} &= -\beta \frac{S}{N} (I_c + I_{sc}) - \beta_v \frac{S}{N} (I_{c,v} + I_{sc,v}) & (1) \\
 \frac{dS_v}{dt} &= -\beta \frac{S_v}{N} (I_c + I_{sc}) - \beta_v \frac{S_v}{N} (I_{c,v} + I_{sc,v}) \\
 \frac{dE}{dt} &= \beta \frac{S}{N} (I_c + I_{sc}) + \beta_v \frac{S}{N} (I_{c,v} + I_{sc,v}) - \sigma E \\
 \frac{dE_v}{dt} &= \beta \frac{S_v}{N} (I_c + I_{sc}) + \beta_v \frac{S_v}{N} (I_{c,v} + I_{sc,v}) - \sigma E_v \\
 \frac{dI_c}{dt} &= \nu \sigma E - \gamma I_c \\
 \frac{dI_{c,v}}{dt} &= \nu_v \sigma E_v - \gamma I_{c,v} \\
 \frac{dI_{sc}}{dt} &= (1 - \nu) \sigma E - \gamma I_{sc} \\
 \frac{dI_{sc,v}}{dt} &= (1 - \nu_v) \sigma E_v - \gamma I_{sc,v} \\
 \frac{dR}{dt} &= \gamma (I_c + I_{c,v} + I_{sc} + I_{sc,v})
 \end{aligned}$$

## 140 Conditions and Parameter Values

141 Total population size for the simulations was fixed at  $N = 100k$  and we assume 20% of the population  
142 is already in the ‘recovered’ class  $R$ . The initial size of the exposed class  $E$  was set to 200 individuals,  
143 and values for the  $I_c$  and  $I_{sc}$  classes were calculated under a fast dynamics assumption:

$$I_c = \frac{\nu\sigma E}{\gamma} = 140$$
$$I_{sc} = \frac{(1-\nu)\sigma E}{\gamma} = 260$$

144 The initial size of the susceptible class  $S = 0.8(1-f)N$  and the initial susceptible vaccinated  
145 class  $S_v = 0.8fN$ , where  $f$  is the vaccination coverage level. All other vaccinated classes ( $E_v$ ,  $I_{sc,v}$ ,  
146  $I_{c,v}$ ) are initially set to 0, and simulations were run for one year.

147 We set the average latent period ( $1/\sigma$ ) to 4.6 days and the average infectious period ( $1/\gamma$ ) to 5  
148 days [18]. We set the transmission rate  $\beta$  to 0.5 per day, resulting in a basic reproduction number  
149 of  $R_0 = 2.5$  [19]. We set the risk of an unvaccinated individual developing a clinical infection at  
150  $\nu = 0.14$  [20], and the risk of dying from a clinical infection at  $\rho_c = 0.02$  [21, 22].
